# Supplementary material for: Precipitation fate and transport in a Mediterranean catchment through models calibrated on plant and stream water isotope data
Source: Copernicus journal article supplement (doi:10.5194/hess-2022-93), 2022-03-08
Supplement: Supplementary file 1 [file hess-2022-93-supplement.pdf]

## Precipitation fate and transport in a Mediterranean catchment through models calibrated on plant and stream water isotope data

Matthias Sprenger<sup>1,2,3\*</sup>, Pilar Llorens<sup>1</sup>, Francesc Gallart<sup>1</sup>, Paolo Benettin<sup>4</sup>, Scott T. Allen<sup>5</sup>, Jérôme Latron<sup>1</sup>

<sup>1</sup>Institute of Environmental Assessment and Water Research (IDAEA-CSIC), Barcelona, Spain

<sup>2</sup>Ecohydrology & Watershed Science group, North Carolina State University, Raleigh, USA

<sup>3</sup>now at Earth & Environmental Sciences Area, Lawrence Berkeley National Laboratory, Berkeley, USA

<sup>4</sup>Laboratory of Ecohydrology ENAC/IIE/ECHO, École Polytechnique Fédérale de Lausanne (EPFL), Lausanne, Switzerland

<sup>5</sup>Dept. of Natural Resources and Environmental Science, University of Nevada, Reno, USA

\*Corresponding author: msprenger@lbl.gov

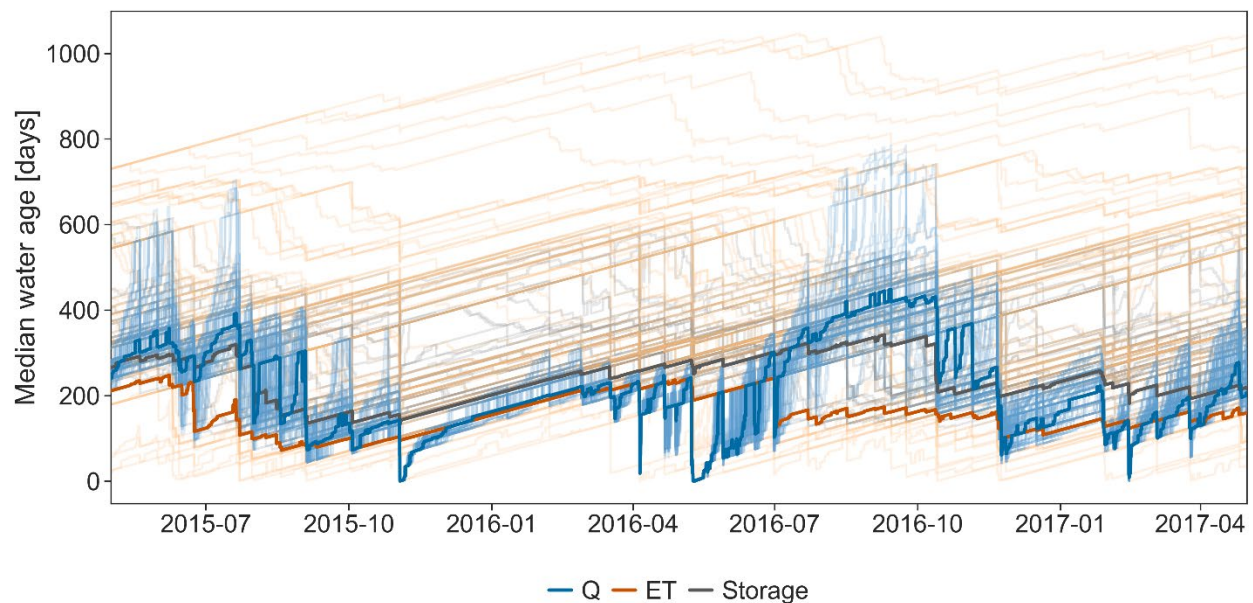

**Suppl. Fig. 1** Median water age in stream runoff (Q, blue), the catchment's storage (S, grey), and the evapotranspiration flux (ET, orange). Age estimates shown for the best simulation (dark color) and the top 100 simulations (light color) for the conventional calibration approach,  $KGE_Q$ . Compared to the results of the multi-objective calibration (Figure 5), the median ages of Q, S and ET are more uncertain and tend to overlap.
