# Supplementary material for: Precipitation fate and transport in a Mediterranean catchment through models calibrated on plant and stream water isotope data
Source: Copernicus journal article supplement (doi:10.5194/hess-2022-93), 2022-03-08

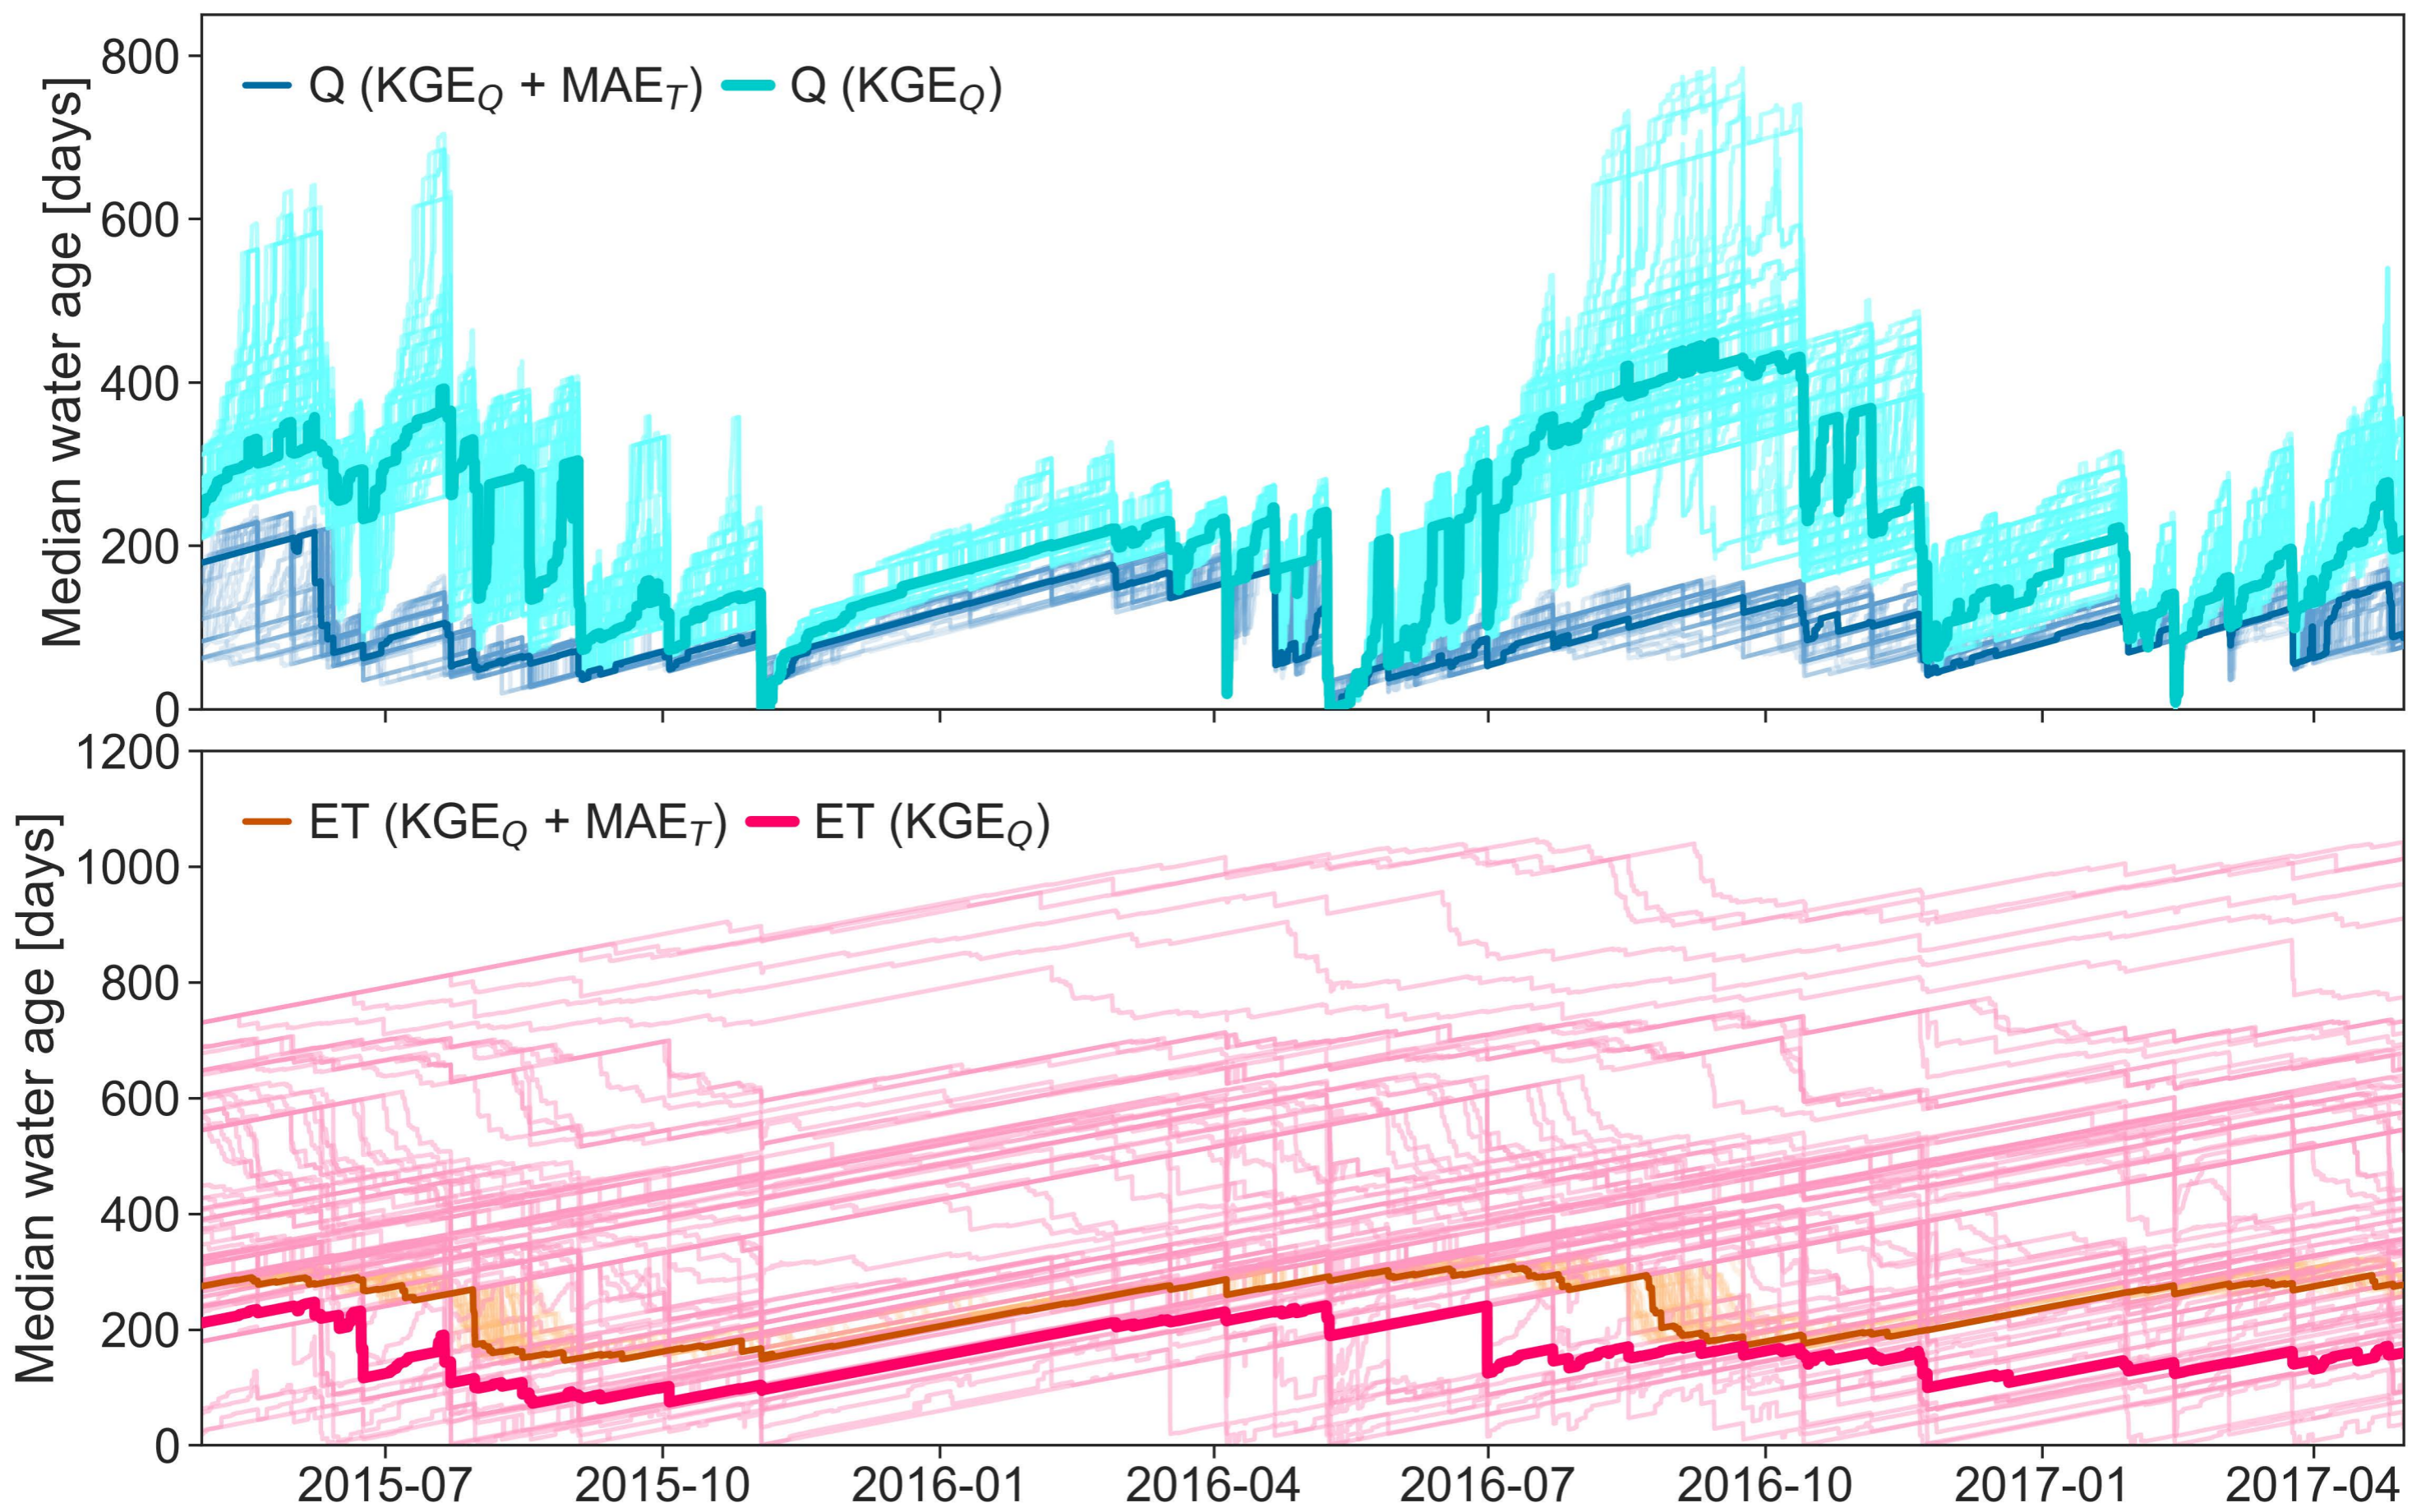

Supplement: Supplementary file [file hess-2022-93-AC2-supplement.pdf]
